# Supplementary material for: Staphylococcal Enterotoxin Gene Cluster: Prediction of Enterotoxin (SEG and SEI) Production and of the Source of Food Poisoning on the Basis of vSaβ Typing
Source: PubMed Central journal article supplement (PMC8090894; doi:10.1128/aem.02662-20), 2021-02-12
Supplement: AEM.02662-20-s0001.pdf [file AEM.02662-20-s0001.pdf]

1 **Supplementary Material**

2 Table S1

| <b>Strain</b> | <b>SEG [ng/ml]<br/>+/- SD</b> | <b>SEI [ng/ml] +/-<br/>SD</b> |
|---------------|-------------------------------|-------------------------------|
| 05CEB52STA    | 2.59 +/- 0.46                 | 15.25 +/- 2.94                |
| 07CEB90STA    | 0.9 +/- 0.10                  | 14.34 +/- 1.38                |
| 11CEB279STA   | 1.55 +/- 0.14                 | 20.63 +/- 1.97                |
| 13CEB177STA   | 0.80 +/- 0.11                 | 11.18 +/- 1.85                |
| 13CEB179STA   | 0.99 +/- 0.11                 | 21.03 +/- 3.77                |
| 13CEB181STA   | 0.78 +/- 0.13                 | 1.86 +/- 0.92                 |
| 13CEB182STA   | 0*                            | 3.08 +/- 0.34                 |
| 13CEB188STA   | 1.37 +/- 0.12                 | 18.52 +/- 1.08                |
| 13CEB190STA   | 0*                            | 2.58 +/- 0.74                 |
| 13CEB323STA   | 3.79 +/- 1.58                 | 61.43 +/- 10.29               |
| 13CEB327STA   | 1.00 +/- 0.19                 | 2.33 +/- 1.16                 |
| 15SBCL1299STA | 2.42 +/- 0.58                 | 40.8 +/- 5.23                 |
| 15SBCL1397STA | 2.31 +/- 0.55                 | 36.32 +/- 3.98                |
| 15SBCL1438STA | 0*                            | 2.11 +/- 1.21                 |
| 15SBCL1517STA | 0.99 +/- 0.21                 | 21.97 +/- 2.19                |
| 15SBCL1527STA | 1.62 +/- 0.28                 | 26.53 +/- 0.94                |
| 17SBCL08STA   | 1.23 +/- 0.06                 | 11.24 +/- 0.39                |
| 17SBCL13STA   | 1.42 +/- 0.14                 | 14.89 +/- 0.98                |
| 18SBCL669     | 1.77 +/- 0.01                 | 3.85 +/- 0.99                 |
| 18SBCL670     | 0*                            | 1.15 +/- 0.47                 |
| 18SBCL672     | 0*                            | 10.77 +/- 1.22                |
| 18SBCL673     | 2.04 +/- 0.33                 | 40.58 +/- 9.03                |
| 18SBCL674     | 2.11 +/- 0.21                 | 37.66 +/- 3.69                |
| 18SBCL675     | 0.26 +/- 0.01                 | 3.33 +/- 0.33                 |
| 18SBCL677     | 1.34 +/- 0.10                 | 22.65 +/- 3.13                |
| 18SBCL678     | 0*                            | 2.84 +/- 0.28                 |
| 18SBCL679     | 1.73 +/- 0.12                 | 29.05 +/- 3.48                |
| G19F          | 1.05 +/- 0.13                 | 16.29 +/- 0.76                |
| G68P          | 1.08 +/- 0.10                 | 1.403 +/- 0.64                |
| M2323         | 0*                            | 1.06 +/- 0.17                 |
| M3783         | 0*                            | 1.57 +/- 0.22                 |
| Mu50          | 4.26 +/- 0.78                 | 35.63 +/- 3.02                |

3 *\*under the limit of detection*

4

5

6

7 Table S2

| Strain name   | Bio Project  | Accession Nr. |
|---------------|--------------|---------------|
| 05CEB52STA    | PRJEB36867** | ERS4338875    |
| 07CEB90STA    | PRJEB36867** | ERS4338881    |
| 07CEB94STA    | PRJEB36867** | ERS4338884    |
| 11CEB145STA   | PRJEB36867** | ERS4338891    |
| 11CEB277STA   | PRJEB36867** | ERS4338897    |
| 11CEB279STA   | PRJEB36867** | ERS4338899    |
| 13CEB177STA   | PRJEB36867** | ERS4338908    |
| 13CEB178STA   | PRJEB36867** | ERS4338909    |
| 13CEB179STA   | PRJEB36867** | ERS4338910    |
| 13CEB181STA   | PRJEB36867** | ERS4338911    |
| 13CEB182STA   | PRJEB36867** | ERS4338912    |
| 13CEB188STA   | PRJEB36867** | ERS4338914    |
| 13CEB190STA   | PRJEB36867** | ERS4338915    |
| 13CEB191STA   | PRJEB36867** | ERS4338916    |
| 13CEB312STA   | PRJEB36867** | ERS4338928    |
| 13CEB313STA   | PRJEB36867** | ERS4338929    |
| 13CEB317STA   | PRJEB36867** | ERS4338933    |
| 13CEB318STA   | PRJEB36867** | ERS4338934    |
| 13CEB323STA   | PRJEB36867** | ERS4338938    |
| 13CEB327STA   | PRJEB36867** | ERS4338941    |
| 13CEB328STA   | PRJEB36867** | ERS4338942    |
| 13CEB329STA   | PRJEB36867** | ERS4338943    |
| 15SBCL1292STA | PRJEB36867** | ERS4338961    |
| 15SBCL1299STA | PRJEB36867** | ERS4338962    |
| 15SBCL1397STA | PRJEB36867** | ERS4338965    |
| 15SBCL1409STA | PRJEB36867** | ERS4338967    |
| 15SBCL1428STA | PRJEB36867** | ERS4338968    |
| 15SBCL1438STA | PRJEB36867** | ERS4338971    |
| 15SBCL1507STA | PRJEB36867** | ERS4338973    |
| 15SBCL1517STA | PRJEB36867** | ERS4338975    |
| 15SBCL1527STA | PRJEB36867** | ERS4338977    |
| 15SBCL1550STA | PRJEB36867** | ERS4338980    |
| 17SBCL08STA   | PRJEB36867** | ERS4338988    |
| 17SBCL09STA   | PRJEB36867** | ERS4338989    |
| 17SBCL13STA   | PRJEB36867** | ERS4338990    |
| 17SBCL202STA  | PRJEB36867** | ERS4338992    |
| 17SBCL208STA  | PRJEB36867** | ERS4338993    |
| 17SBCL214STA  | PRJEB36867** | ERS4338994    |
| 17SBCL220STA  | PRJEB36867** | ERS4338995    |
| 17SBCL225STA  | PRJEB36867** | ERS4338997    |
| 17SBCL580STA  | PRJEB36867** | ERS4339000    |

|              |              |                 |
|--------------|--------------|-----------------|
| 17SBCL585STA | PRJEB36867** | ERS4339001      |
| 18 SBCL671*  | PRJNA633807  | JABUAB000000000 |
| 18 SBCL 676* | PRJNA633807  | JABUAA000000000 |
| 18 SBCL 680* | PRJNA633807  | JABTZZ000000000 |
| 18 SBCL667*  | PRJNA633807  | JABTZY000000000 |
| 18SBCL669*   | PRJNA633807  | JABTZX000000000 |
| 18SBCL670*   | PRJNA633807  | JABTZW000000000 |
| 18SBCL672*   | PRJNA633807  | JABTZV000000000 |
| 18SBCL673*   | PRJNA633807  | JABTZY000000000 |
| 18SBCL674*   | PRJNA633807  | JABTZX000000000 |
| 18SBCL675*   | PRJNA633807  | JABTZU000000000 |
| 18SBCL677*   | PRJNA633807  | JABTZX000000000 |
| 18SBCL678*   | PRJNA633807  | JABTZY000000000 |
| 18SBCL679*   | PRJNA633807  | JABTZS000000000 |
| 502A         | -            | CP007454.1      |
| ATCC25923    | -            | CP009361.1      |
| G11F         | PRJNA531079  | SZYL000000000   |
| G19F         | PRJNA531079  | SZYN000000000   |
| G68P         | PRJNA531079  | SZYR000000000   |
| GN3          | -            | AP017891        |
| KS90*        | PRJNA633807  | JABTZQ000000000 |
| M1280        | PRJNA531079  | SZYW000000000   |
| M1655        | PRJNA531079  | SZYX000000000   |
| M2323        | PRJNA531079  | SZYZ000000000   |
| M2682        | PRJNA531079  | SZZB000000000   |
| M2839        | PRJNA531079  | SZZC000000000   |
| M3783        | PRJNA531079  | SZZE000000000   |
| MRSA252      | -            | BX571856        |
| Mu50         | -            | BA000017        |
| N315         | -            | BA000018        |
| NZAK3        | -            | LT009690        |
| RF122        | -            | AJ938182        |
| ST288        | -            | FFXA01000001    |
| USA600       | -            | CP006044        |

8 \*Strains sequenced in this study

9 \*\* Data only available on Ena database ([www.ebi.ac.uk](http://www.ebi.ac.uk))

10

11

12

13

## 14 Table S3

| <b>Strain</b> | <b>Coverage<br/>[X]</b> | <b>Nr. of contigs</b> | <b>Contig<br/>N50 [bp]</b> | <b>Cds</b> |
|---------------|-------------------------|-----------------------|----------------------------|------------|
| 18 SBCL667    | 325                     | 33                    | 2,696,853                  | 2487       |
| 18SBCL669     | 360                     | 45                    | 2,739,638                  | 2263       |
| 18SBCL670     | 279                     | 69                    | 2,741,546                  | 2590       |
| 18 SBCL671    | 278                     | 49                    | 2,805,767                  | 2617       |
| 18SBCL672     | 399                     | 19                    | 2,737,181                  | 2395       |
| 18SBCL673     | 267                     | 17                    | 2,751,056                  | 2281       |
| 18SBCL674     | 234                     | 41                    | 2,748,718                  | 2293       |
| 18SBCL675     | 245                     | 19                    | 2,829,665                  | 2582       |
| 18 SBCL676    | 296                     | 23                    | 2,719,997                  | 2298       |
| 18SBCL677     | 275                     | 60                    | 2,723,142                  | 2298       |
| 18SBCL678     | 305                     | 126                   | 2,912,510                  | 2527       |
| 18SBCL679     | 203                     | 12                    | 2,719,626                  | 2376       |
| 18 SBCL680    | 336                     | 65                    | 2,691,599                  | 2488       |
| KS90          | 380                     | 84                    | 2,817,361                  | -          |

15

16

17 Statistical analysis data

18 Robust linear regression for verify the regression model and to identify outliers

|                    |      |
|--------------------|------|
| Dependent Variable | MW_I |
| No. of cases       | 32   |
| No. of Regressors  | 1    |

**Least Median of Squares (LMS) Regression**

|                      |                   |
|----------------------|-------------------|
| Method of Estimation | Exhaustive search |
|----------------------|-------------------|

|                      |     |
|----------------------|-----|
| Number of Subsamples | 496 |
|----------------------|-----|

**LMS Parameter Estimates**

| Effect   | Coefficient |
|----------|-------------|
| CONSTANT | 0.8590      |
| MW_G     | 15.5887     |

|                 |        |
|-----------------|--------|
| Scale Estimates | 4.7558 |
|-----------------|--------|

|                             |        |
|-----------------------------|--------|
| Cutoff Point                | 3.0000 |
| Number of Outliers Detected | 4      |

|                 |        |
|-----------------|--------|
| Robust R-Square | 0.9648 |
|-----------------|--------|

19

OLS and ROBUST Lines Plot

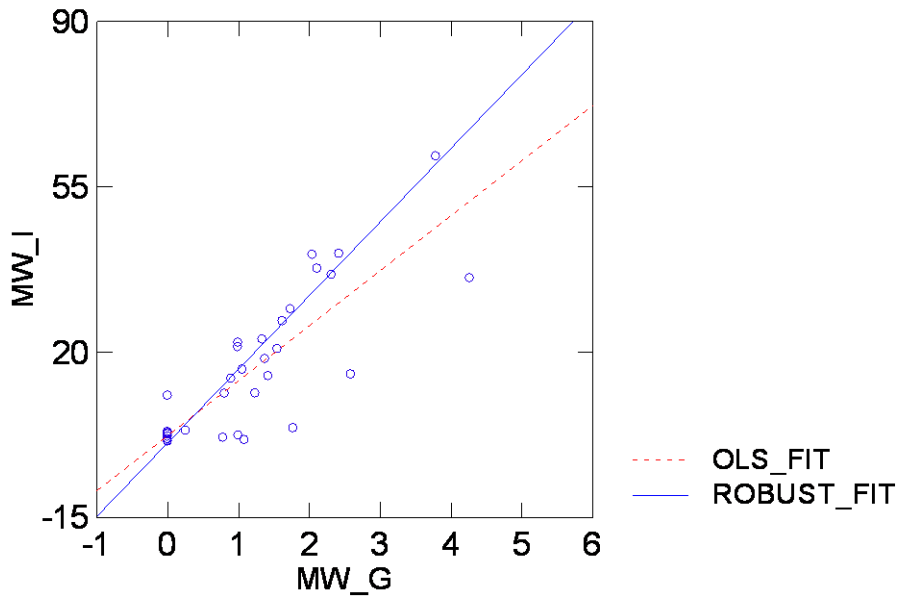

20

21 Figure S1: Ordinary least square and robust lines plot

Plot of Residuals vs. Predicted Values

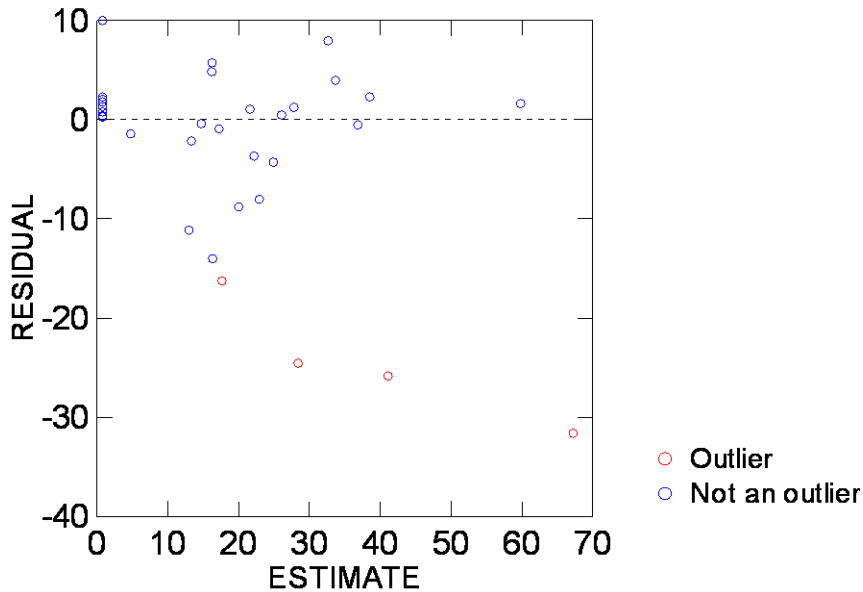

22  
23  
24  
25

Figure S2: Plot of residuals vs. predicted values from the Robust linear regression

**Ordinary least square regression analysis without outliers**

|                                    |        |
|------------------------------------|--------|
| <b>Dependent Variable</b>          | MW_I   |
| <b>N</b>                           | 28     |
| <b>Multiple R</b>                  | 0.9400 |
| <b>Squared Multiple R</b>          | 0.8837 |
| <b>Adjusted Squared Multiple R</b> | 0.8792 |
| <b>Standard Error of Estimate</b>  | 5.4078 |

**Regression Coefficients  $B = (X'X)^{-1}X'Y$**

| Effect          | Coefficient | Standard Error | Std. Coefficient | Tolerance | t       | p-Value |
|-----------------|-------------|----------------|------------------|-----------|---------|---------|
| <b>CONSTANT</b> | 0.6346      | 1.5529         | 0.0000           | .         | 0.4086  | 0.6862  |
| <b>MW_G</b>     | 15.4884     | 1.1020         | 0.9400           | 1.0000    | 14.0550 | 0.0000  |

**Analysis of Variance**

| Source            | SS         | df | Mean Squares | F-Ratio  | p-Value |
|-------------------|------------|----|--------------|----------|---------|
| <b>Regression</b> | 5'777.0610 | 1  | 5'777.0610   | 197.5428 | 0.0000  |
| <b>Residual</b>   | 760.3596   | 26 | 29.2446      |          |         |

26

Confidence Interval and Prediction Interval

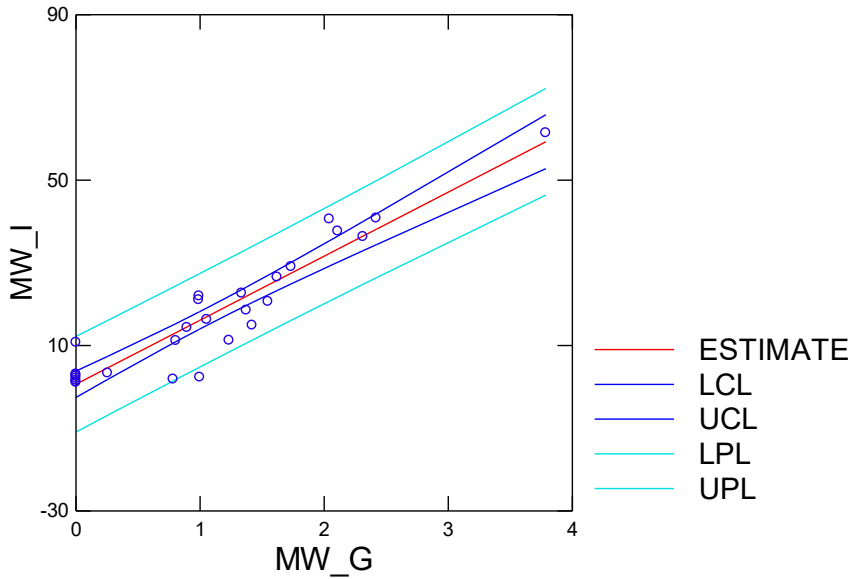

27  
28  
29  
30

Figure S3: Confidence interval and prediction interval of the ordinary least square regression analysis without outliers

Plot of Residuals vs. Predicted Values

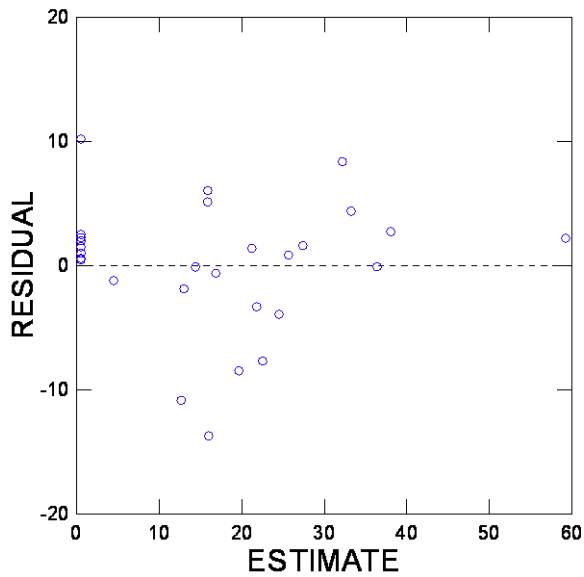

31  
32  
33  
34

Figure S4: Plot of residuals vs. predicted values from ordinary least square regression analysis without outliers
